# Supplementary material for: A high-throughput chemical screen identifies novel inhibitors and enhancers of anti-inflammatory functions of the glucocorticoid receptor
Source: PubMed Central journal article supplement (PMC5547123; doi:10.1038/s41598-017-07565-2), 2017-08-07

## **Supplementary Files**

**A high-throughput chemical screen identifies  
novel inhibitors and enhancers of anti-  
inflammatory functions of the glucocorticoid  
receptor**

Xiaofeng Jiang<sup>1</sup>, Amber Dahlin<sup>2</sup>, Scott T. Weiss<sup>2</sup>,  
Kelan Tantisira<sup>2</sup> and Quan Lu<sup>1\*</sup>

**Supplementary Table 1:** Bioactivities and assay II/I ratios of GR inhibitors and enhancers.

| Compounds         | Assay II/I ratio | Bioactivities                         |
|-------------------|------------------|---------------------------------------|
| Alsterpaullone    | 0.70             | GSK3 $\beta$ , Cdk1/cylin B inhibitor |
| RO0275062         | 0.85             | GSK3 $\beta$ inhibitor                |
| RO0317753         | 0.91             | GSK3 $\beta$ inhibitor                |
| Pyrrromycin       | 0.77             | DNA intercalation                     |
| Camptothecin      | 1.0              | DNA topoisomerase I inhibitor         |
| TPCA-1            | 0.28             | IKK2 inhibitor                        |
| IKK2 inhibitor VI | 0.30             | IKK2 inhibitor                        |

\* Assay II/I ratio for DMSO is 0.4

**Supplementary Figure S1:** Effects of IL1 $\beta$  on NF $\kappa$ B activation in A549 cells (A), on IL-6 release in A549 cells (B), and on IL-6 release in human airway smooth muscle cells (C).

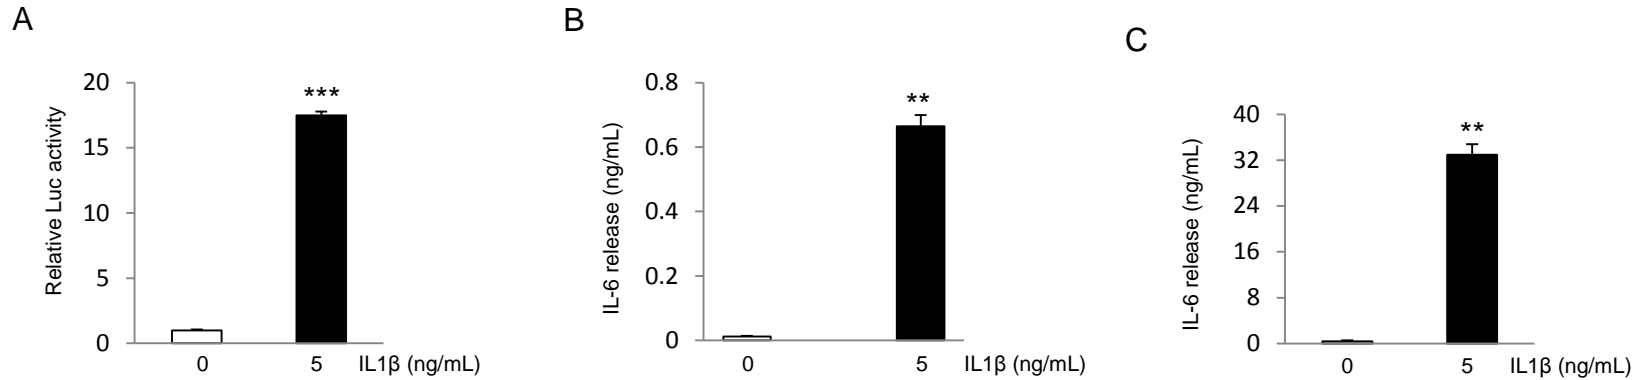

**Supplementary Figure S2:** Effects of TPCA-1 on GR mRNA expression. A549 cells were treated with different concentrations of TPCA-1 for 48 h, and qPCR was used to measure GR mRNA level.

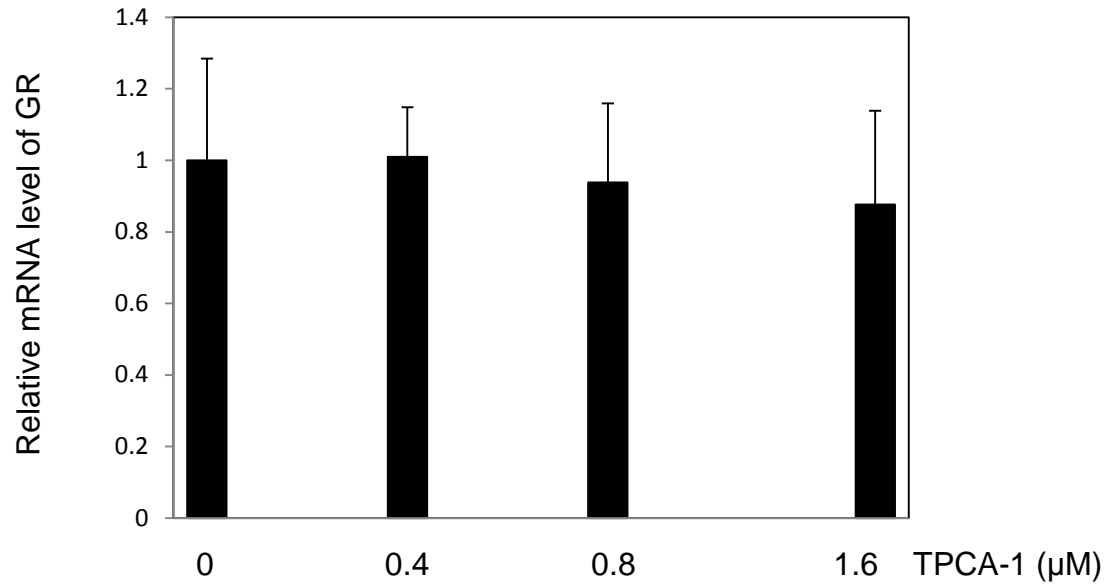

**Supplementary Figure S3:** A: Effect of IL-1 $\beta$  (5 ng/mL) treatment on NF- $\kappa$ B activation. B: Effect of TPCA-1 (0.8  $\mu$ M) on NF- $\kappa$ B repression by Dex (0.5 nM) in A549/NF- $\kappa$ B-luc cells. All treatments were done for 4 h. Luciferase assays were performed after 4 h treatment.

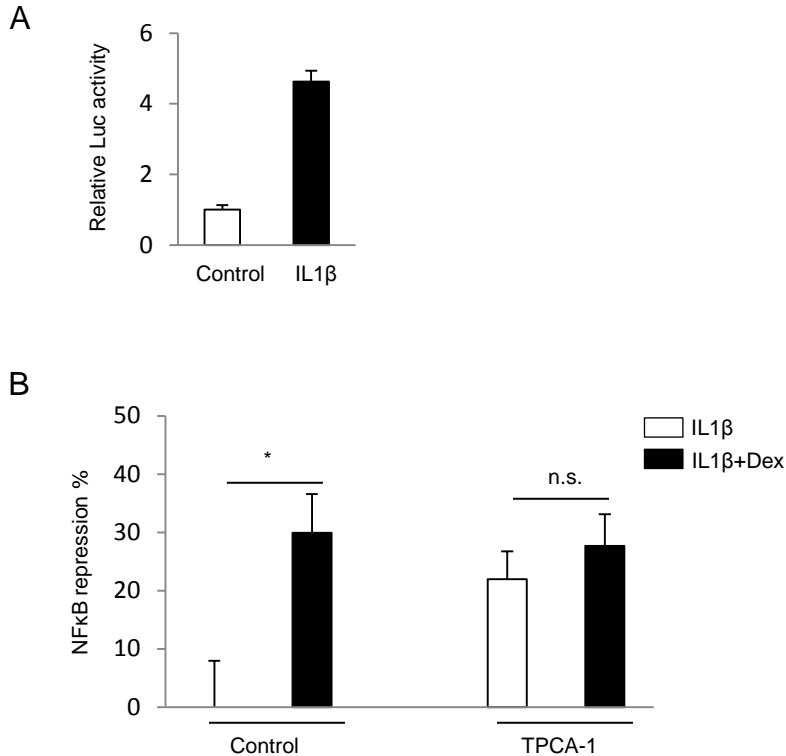

**Supplementary Figure S4:** GR antagonist RU486 attenuates the effect of Dex and TPCA-1 on NFκB repression. The reporter cells were treated with 5ng/mL IL-1β ± 0.5 nM Dex, 0.4 μM TPCA-1 or 5 nM RU486 as indicated for 18 h. Luciferase assays were performed, and NF-κB repression was calculated relative to the cells treated with IL1β. n.s., no significance. \*, P < 0.05. \*\*, P < 0.01, \*\*\*P < 0.005.

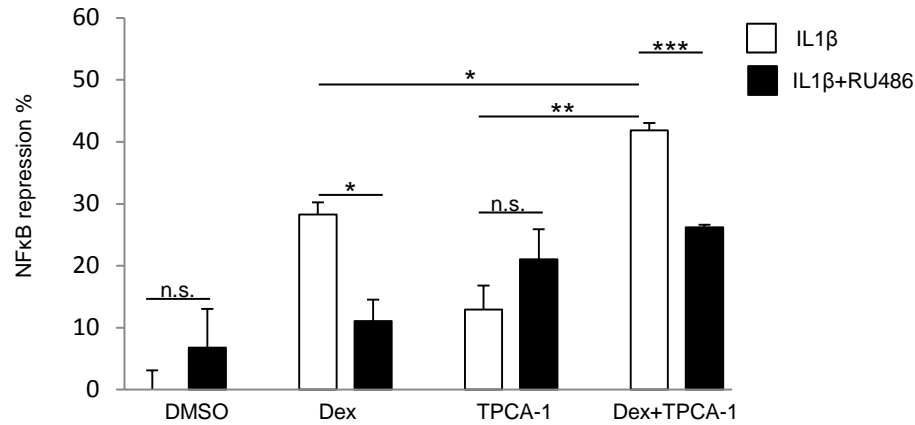

# Supplementary Figure S5: Full-length blots for Fig.4

A

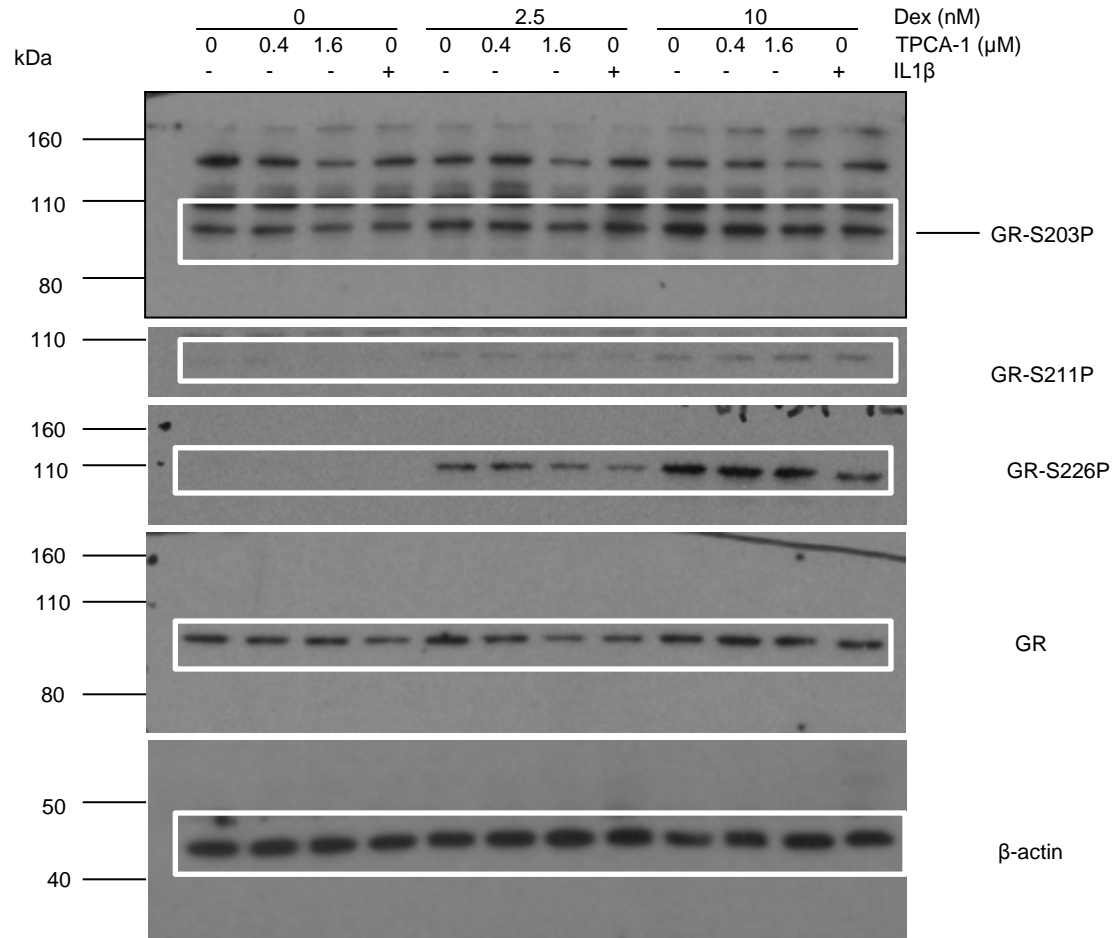

**B**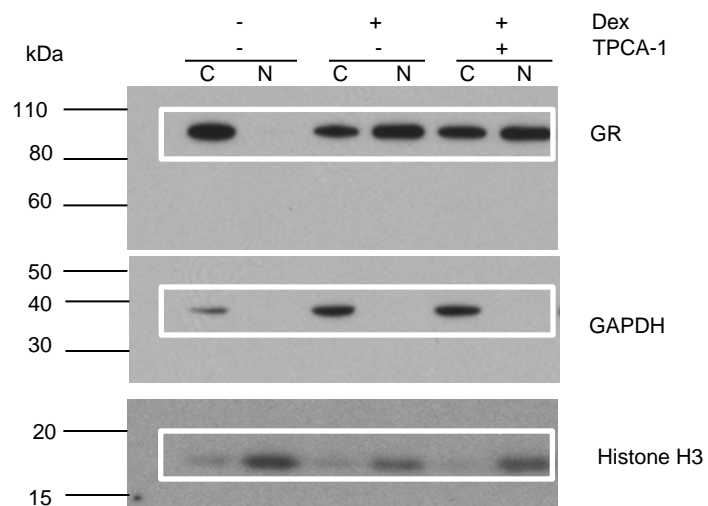**C**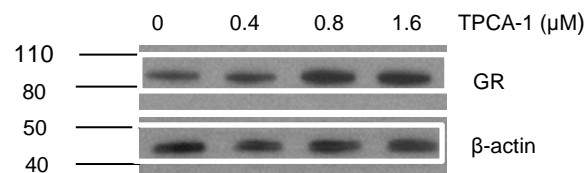**D**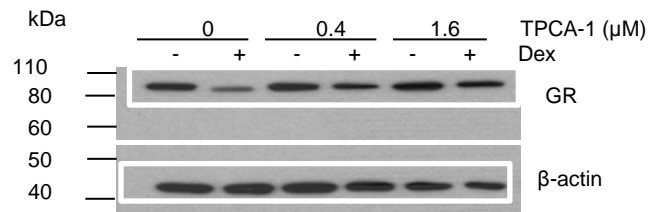**E**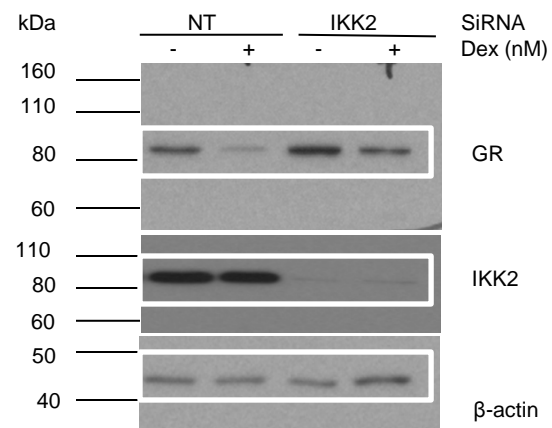

Supplement: 41598_2017_7565_MOESM1_ESM.pdf [file 41598_2017_7565_MOESM1_ESM.pdf]
